# Supplementary material for: Steamed bread enriched with quercetin as an antiglycative food product: its quality attributes and antioxidant properties
Source: Royal Society of Chemistry journal article supplement (doi:10.1039/c8fo00818c), 2018-01-01
Supplement: c8fo00818c1.pdf [file c8fo00818c1.pdf]

1 Supplementary material

2 **Table 5.** Specific volume of and texture analysis of the steamed bread fortified with

3 various levels of quercetin (0 - 0.8%)

---

| Sample       | Specific                       |                           |                        |                        |                           |                        |
|--------------|--------------------------------|---------------------------|------------------------|------------------------|---------------------------|------------------------|
|              | Volume<br>(cm <sup>3</sup> /g) | Hardness (N)              | Springiness            | Cohesiveness           | Chewiness (N)             | Resilience             |
| Control (0%) | 3.02±0.05 <sup>a</sup>         | 305.96±18.55 <sup>a</sup> | 1.05±0.04 <sup>a</sup> | 0.90±0.08 <sup>a</sup> | 287.81±19.84 <sup>a</sup> | 0.57±0.08 <sup>a</sup> |
| 0.05%        | 2.96±0.13 <sup>a</sup>         | 332.35±19.35 <sup>a</sup> | 1.08±0.13 <sup>a</sup> | 0.88±0.08 <sup>a</sup> | 314.22±40.66 <sup>a</sup> | 0.56±0.01 <sup>b</sup> |
| 0.10%        | 2.95±0.12 <sup>a</sup>         | 323.31±31.34 <sup>a</sup> | 1.01±0.03 <sup>a</sup> | 0.90±0.01 <sup>a</sup> | 294.09±24.33 <sup>a</sup> | 0.56±0.01 <sup>b</sup> |
| 0.20%        | 2.94±0.13 <sup>a</sup>         | 316.05±24.31 <sup>a</sup> | 1.04±0.08 <sup>a</sup> | 0.89±0.01 <sup>b</sup> | 292.03±29.27 <sup>a</sup> | 0.56±0.01 <sup>b</sup> |
| 0.40%        | 2.98±0.11 <sup>a</sup>         | 311.74±37.27 <sup>a</sup> | 1.02±0.06 <sup>a</sup> | 0.88±0.01 <sup>b</sup> | 280.72±31.71 <sup>a</sup> | 0.56±0.01 <sup>b</sup> |
| 0.80%        | 2.93±0.17 <sup>a</sup>         | 327.49±30.93 <sup>a</sup> | 1.05±0.09 <sup>a</sup> | 0.88±0.01 <sup>b</sup> | 304.56±33.36 <sup>a</sup> | 0.56±0.01 <sup>b</sup> |

---

4 Data values in the same column with different superscript letters are significantly

5 different ( $p < 0.05$ ).

6

7

8

9

10

11

12

13 **Table 6** Colour parameters ( $L^*$ ,  $a^*$  and  $b^*$ ) of steamed bread enriched with various  
 14 levels of quercetin (0 - 0.8%)

| Sample       | Skin                       |                           |                           | Crumb                     |                           |                           |
|--------------|----------------------------|---------------------------|---------------------------|---------------------------|---------------------------|---------------------------|
|              | $L^*$                      | $a^*$                     | $b^*$                     | $L^*$                     | $a^*$                     | $b^*$                     |
| Control (0%) | 82.53±0.18 <sup>a,A</sup>  | -1.04±0.01 <sup>a,A</sup> | 14.34±0.24 <sup>f,A</sup> | 77.00±0.32 <sup>a,B</sup> | -0.85±0.03 <sup>a,B</sup> | 12.97±0.51 <sup>f,B</sup> |
| 0.05%        | 76.55±0.55 <sup>b,A</sup>  | -3.15±0.07 <sup>b,A</sup> | 24.67±0.42 <sup>e,A</sup> | 73.64±0.68 <sup>b,B</sup> | -3.00±0.09 <sup>b,A</sup> | 22.22±0.55 <sup>e,A</sup> |
| 0.10%        | 75.34±0.44 <sup>c,A</sup>  | -3.14±0.09 <sup>b,A</sup> | 28.74±0.47 <sup>d,A</sup> | 71.39±0.71 <sup>c,B</sup> | -3.01±0.06 <sup>b,A</sup> | 26.02±0.44 <sup>d,A</sup> |
| 0.20%        | 75.24±1.02 <sup>c,A</sup>  | -3.97±0.11 <sup>c,A</sup> | 30.08±0.88 <sup>c,A</sup> | 69.74±1.15 <sup>d,B</sup> | -3.59±0.07 <sup>c,B</sup> | 27.89±0.80 <sup>c,A</sup> |
| 0.40%        | 74.82±0.54 <sup>c,A</sup>  | -4.45±0.10 <sup>d,A</sup> | 34.14±0.31 <sup>b,A</sup> | 68.85±1.07 <sup>d,B</sup> | -4.26±0.15 <sup>d,A</sup> | 31.58±0.87 <sup>b,A</sup> |
| 0.80%        | 75.59±0.59 <sup>bc,A</sup> | -6.21±0.21 <sup>e,A</sup> | 44.47±0.58 <sup>a,A</sup> | 69.98±1.39 <sup>d,B</sup> | -6.06±0.04 <sup>e,A</sup> | 42.08±0.64 <sup>a,A</sup> |

15 Data values in the same column with different lowercase superscript letters are  
 16 significantly different ( $p < 0.05$ ) across the quercetin percentage. At the same  
 17 quercetin addition level, for each parameter (i.e.  $L^*$ ,  $a^*$  and  $b^*$ ), data values with  
 18 different uppercase superscript letters are significantly different ( $p < 0.05$ ) between  
 19 bread skin and bread crumb.

20

21
